# Supplementary material
Source: publisher site journal article supplement (https://www.dovepress.com/article/supplementary_file/621981/621981%20Supplementary%20file.docx)
Supplement: Supplementary file 1 [file 621981%20Supplementary%20file.docx]

**Supplementary Information 1**

**Semi-Structured Interview Guide**

**Target Audience:** Community members and public cohort participants

**Interviewer Cohort:** Final-year Master of Speech-Language Pathology students

**Administration Note:** All qualitative interviews were conducted verbally in Cantonese to ensure natural narrative flow and comfort for local participants. The audio recordings were subsequently transcribed verbatim and translated into English for rigorous thematic analysis.

**Part I: Interview Protocol & Briefing Instructions**

**1. Welcome and Informed Consent Verification**

- "Thank you for participating in this interview. Before we begin, I would like to confirm that you have read the information sheet and signed the informed consent form."
- "This interview will be audio-recorded and transcribed verbatim for scientific analysis."
- "Your identity and responses will remain strictly anonymous."
- "You may choose to stop the interview at any point."

**2. Pre-Interview Setting Context**

- **Environment:** Conducted in private, quiet rooms at local community or district health centers to eliminate auditory distractions and ensure participant privacy.

**Part II: Core Interview Questions & Standardized Probes**

**Domain 1: Exposure and Cognitive Perceptions of Molded Puree**

- **Question 1 (Q1):** Have you ever come into direct contact with or heard of molded puree (reshaped soft meals)?
- **Question 2 (Q2):** What do you think a molded puree is like? For example, in terms of its outer appearance and its texture/mouthfeel?
  - *Standardized Probes:*
    - How does it visually compare to traditional nursing home pureed foods?
    - What is the anticipated texture? Do you believe it requires any chewing prior to being swallowed safely?

**Domain 2: Assumptions on Preparation Methods & Candidate Suitability**

- **Question 3 (Q3):** How do you assume molded puree is prepared? For example, in terms of the ingredients used or the technical steps involved?
  - *Standardized Probes:*
    - Do you assume it requires specialized commercial tools or additive gelling agents?
    - Is it perceived as highly complex or easily reproducible at home?
- **Question 4 (Q4):** Who do you think needs to consume molded puree? Is it suitable for everyone?

**Domain 3: Expected Holistic Impacts of Molded Puree**

- **Question 5 (Q5):** If you were caring a patient with dysphagia, what impacts do you believe transitioning to molded puree would bring across health, financial, psychological, and social dimensions?
  - *Standardized Probes:*
    - **Health/Nutrition:** Do you expect it to automatically provide higher nutritional density, or improve the body weight?
    - **Financial:** Is it perceived as an expensive item or an affordable alternative compared to regular home cooking?
    - **Psychological/Social:** How does reshaping food to look like everyday meals impact dining dignity and communal family inclusion?

**Part III: Concluding Protocol & Debriefing**

- "This concludes our semi-structured interview questions."
- "Do you have any additional thoughts or questions regarding dysphagia management or molded purees that you would like to share?"
- "Thank you very much for your time. We will now turn off the recorder."
